# Supplementary material
Source: PubMed Central journal article supplement (PMC5951640)
Supplement: NIHMS964843-supplement-supplement_1.pdf [file NIHMS964843-supplement-supplement_1.pdf]

## Supplemental Material

Table e1

## MRI Acquisition Parameters

| Sequence               | Slice Thickness | Matrix                    | TE                                                   | TR          |
|------------------------|-----------------|---------------------------|------------------------------------------------------|-------------|
| <b>T2W FSE/SSFSE</b>   | 4–8 mm          | 256 × 154 to<br>348 × 280 | 70–120 ms                                            | 964–4820 ms |
| <b>T1W GRE (OP/IP)</b> | 5–8 mm          | 193 × 168 to<br>500 × 286 | 2.38 ms / 4.87 ms (1.5 T)<br>1.1 ms / 2.3 ms (3.0 T) | 100–216 ms  |
| <b>T1W SPGR</b>        | 3–6 mm          | 176 × 149 to<br>320 × 259 | 1.6–2.4 ms                                           | 3.4–5.4 ms  |

Note – TE, echo time; TR, repetition time; T2W, T2-weighted; FSE, fast spin-echo; SSFSE, single-shot fast spin-echo; T1W, T1-weighted; GRE, gradient recalled echo; OP, out-of-phase; IP, in-phase; SPGR, spoiled gradient recalled echo

Table E1. MRI Acquisition Parameters

36  
37  
38  
39 **Fig E1.** Oncocytoma. a. A central renal mass with heterogeneous and overall avid  
40 contrast enhancement is noted on this post contrast corticomedullary coronal fat-  
41 saturated T1-weighted gradient recalled echo. Note the presence of areas of higher  
42 (arrowhead) and lower contrast enhancement (arrow). b. On post-contrast venous  
43 phase coronal fat-saturated T1-weighted gradient recalled echo, an inversion of the  
44 enhancement pattern is noted, with lower contrast enhancement in the area pointed by  
45 the arrowhead and higher contrast enhancement pointed by the arrow.  
46  
47  
48  
49  
50  
51  
52  
53  
54  
55  
56  
57  
58  
59  
60

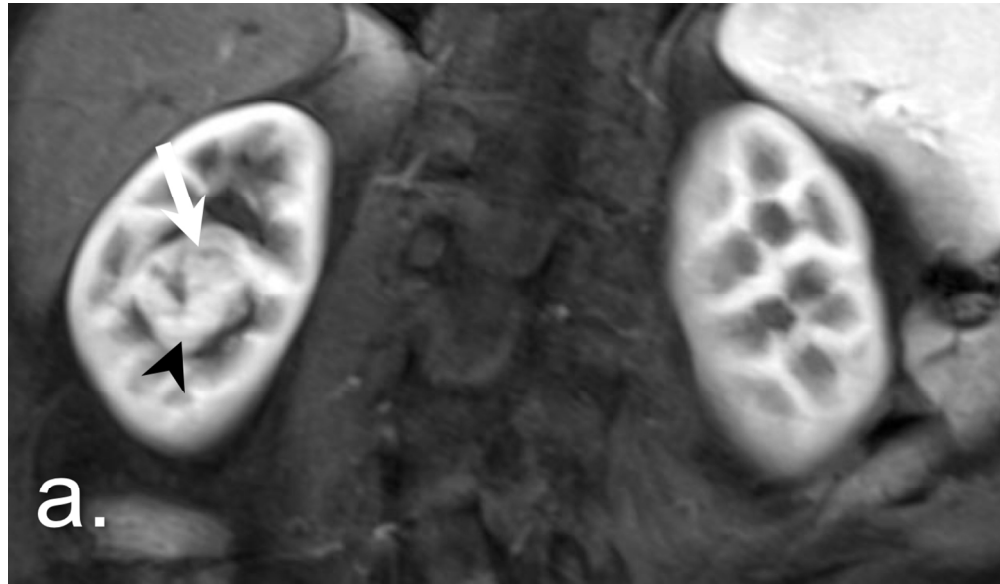

Fig E1a. Oncocytoma. a. A central renal mass with heterogeneous and overall avid contrast enhancement is noted on this post contrast corticomedullary coronal fat-saturated T1-weighted gradient recalled echo. Note the presence of areas of higher (arrowhead) and lower contrast avidity (arrow). b. On post-contrast venous phase coronal fat-saturated T1-weighted gradient recalled echo, an inversion of the enhancement pattern is noted, with lower contrast avidity in the area pointed by the arrowhead and higher contrast avidity pointed by the arrow.

529x307mm (72 x 72 DPI)

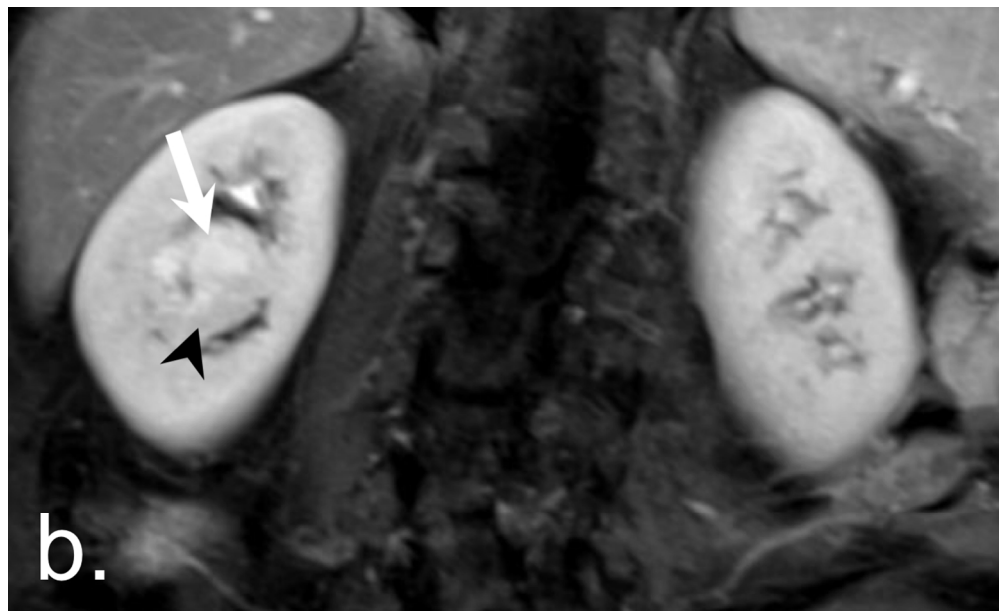

Fig E1b. Oncocytoma. a. A central renal mass with heterogeneous and overall avid contrast enhancement is noted on this post contrast corticomedullary coronal fat-saturated T1-weighted gradient recalled echo. Note the presence of areas of higher (arrowhead) and lower contrast avidity (arrow). b. On post-contrast venous phase coronal fat-saturated T1-weighted gradient recalled echo, an inversion of the enhancement pattern is noted, with lower contrast avidity in the area pointed by the arrowhead and higher contrast avidity pointed by the arrow.

529x321mm (72 x 72 DPI)
